# Supplementary material
Source: PubMed Central journal article supplement (PMC8774794)
Supplement: kiab484_supplementary_data.pdf [file kiab484_supplementary_data.pdf]

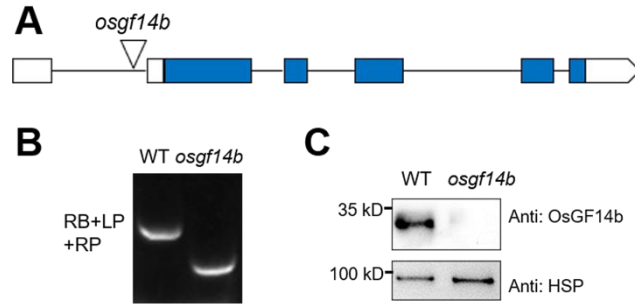

**Supplemental Figure S1.** Molecular characterization of the *osgf14b* mutant. A, Schematic Diagrams of the T-DNA insertion sites in *osgf14b* mutant. Blue boxes represent exons, white boxes represent UTRs, and lines between boxes are introns. B, The mutant was genotyped by PCR using gene- and T-DNA-specific primers. Left panel indicates non T-DNA insertion; right panel, T-DNA insertion. C, The protein level of OsGF14b in the *osgf14b* mutant. The signal was detected by anti-OsGF14b. Rice HSP was used to indicate equal loading of total proteins.

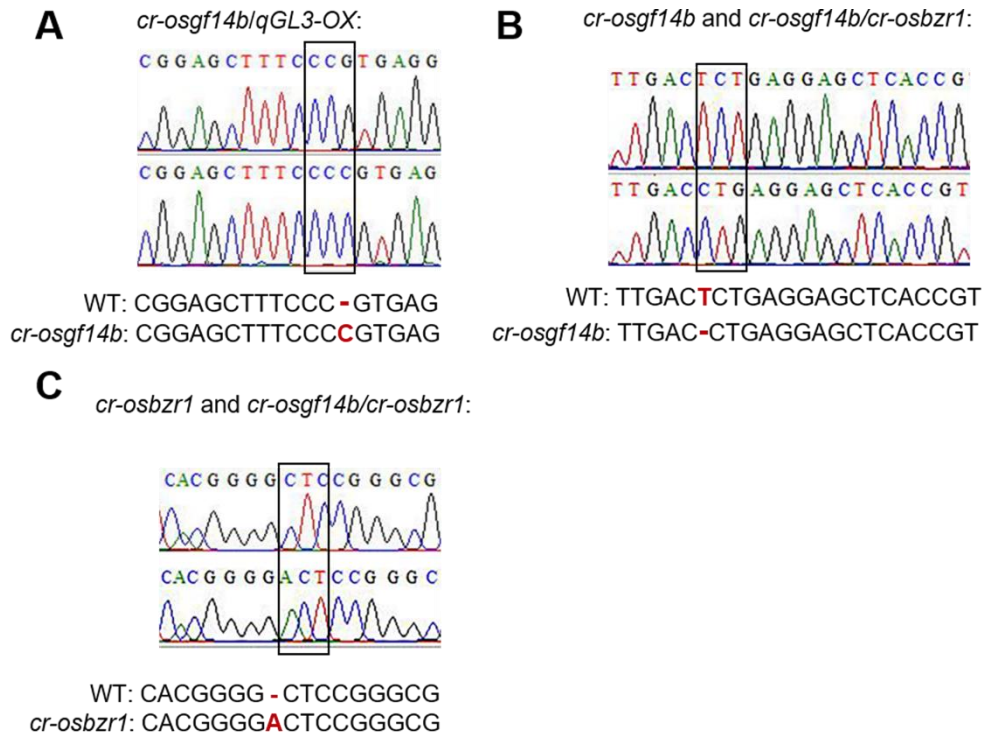

**Supplemental Figure S2.** The sequences of the target genes.

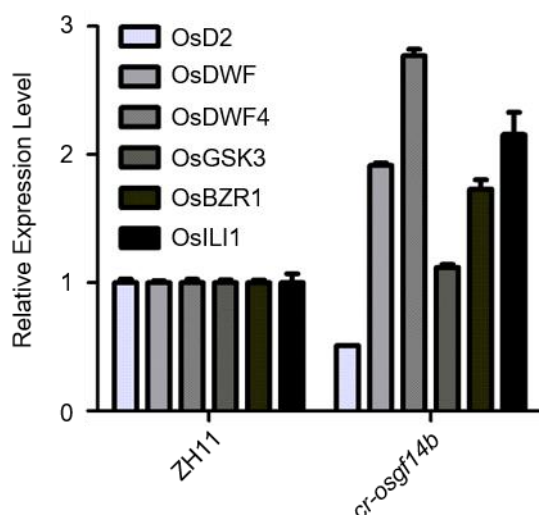

**Supplemental Figure S3.** Expression patterns of BR biosynthesis and signaling-related genes in the seedlings of the WT and *cr-osgf14b* plants. Data are means  $\pm$  SE ( $n = 3$ ).

| Supplemental Table S1 Primers used in this study. |                                       |                        |
|---------------------------------------------------|---------------------------------------|------------------------|
| Primer name                                       | Sequence 5'-3'                        | Purpose                |
| BD-OsBZR1-F                                       | GGCCATGGAGGCCGAATTCATGACGTCCGGGGCGG   | Yeast Two-Hybrid assay |
| BD-OsBZR1-R                                       | CCGCTGCAGGTGCAGGATCCTCATTTCGCGCCGACG  | Yeast Two-Hybrid assay |
| AD-GF14b-F                                        | GAGGCCAGTGAATTCATGTCCGGCACAGGCG       | Yeast Two-Hybrid assay |
| AD-GF14b-R                                        | GAGCTCGATGGATCCTTACTGCCCTCGCT         | Yeast Two-Hybrid assay |
| NE-BZR1-F                                         | GAGAACACGGGGGACTCTAGAATGACGTCCGGGGCGG | BiFC assay             |
| NE-BZR1-R                                         | GTACATCCCGGGAGCGGTACCTTTCGCGCCGACGCCG | BiFC assay             |
| CE-GF14b-F                                        | GAGAACACGGGGGACTCTAGAATGTCGGCACAGGCG  | BiFC assay             |
| CE-GF14b-R                                        | GTACATCCCGGGAGCGGTACCCTGCCCTCGCTGGA   | BiFC assay             |
| Myc-GF14b-F                                       | AGGACTTGAATTCGGTACCCATGTCCGGCACAGGCG  | colP assay             |
| Myc-GF14b-R                                       | AGGCTACGTAGGATCCTTACTGCCCTCGCT        | colP assay             |
| BZR1-GFP-F1                                       | GCTTTCGCGAGCTCGGTACCATGACGTCCGGGGCGG  | colP assay             |
| BZR1-GFP-R1                                       | CCCTTGCTCACCATGGTACCTTTCGCGCCGACGCCG  | colP assay             |
| OsGF14b-target1                                   | ACAGGCGGAGCTTCCCGTG                   | CRISPR                 |
| OsGF14b-target2                                   | GGCCAAGACGGTTGACTCTG                  | CRISPR                 |
| OsBZR1-target                                     | CCAAGATCTTCACGGGGCTC                  | CRISPR                 |
| OsBZR1-qF                                         | TCCCGTACCTGTCATGTGCATC                | Primer for RT-qPCR     |
| OsBZR1-qR                                         | GGTACGTCAAAGCGATCATGCC                | Primer for RT-qPCR     |
| OsGSK3-qF                                         | AGCAACATGAACCAAGGATGCC                | Primer for RT-qPCR     |
| OsGSK3-qR                                         | AGCCAAACCACGGAATATCTGG                | Primer for RT-qPCR     |
| OsD2-qF                                           | TTCAACCCATGGAGGTGGAAGGAG              | Primer for RT-qPCR     |
| OsD2-qR                                           | AGCTGGTGACCAAGTGGTGAAG                | Primer for RT-qPCR     |
| OsDWF4-qF                                         | TAAACGAGACGTTGCGGCTAGG                | Primer for RT-qPCR     |
| OsDWF4-qR                                         | CATCCGCTTGAATGTCATAACCC               | Primer for RT-qPCR     |
| OsDWF-qF                                          | ATCCAGGCCAAGACCAAGGAGATG              | Primer for RT-qPCR     |

|          |                          |                    |
|----------|--------------------------|--------------------|
| OsDWF-qR | TGCCAAGCACAAGGGTGTAGAG   | Primer for RT-qPCR |
| OsLI1-qF | GTAATTTGCAACCATGTCGAGCAG | Primer for RT-qPCR |
| OsLI1-qR | CCTGAAGCTTGGAGAGAAGCTC   | Primer for RT-qPCR |
